# Supplementary material for: Understanding xenon and vacancy behavior in UO2, UN and U3Si2: a comparative DFT+Ustudy
Source: Royal Society of Chemistry journal article supplement (doi:10.1039/d3cp01199b), 2023-01-01
Supplement: d3cp01199b1.pdf [file d3cp01199b1.pdf]

*Supplementary Information for*

**Understanding xenon and vacancy behaviors in UO<sub>2</sub>, UN and U<sub>3</sub>Si<sub>2</sub>:**

**A comparative DFT+U study**

Jiajun Zhao<sup>1</sup>, Dan Sun<sup>2</sup>, Liu Xi<sup>1</sup>, Ping Chen<sup>2</sup>, Jijun Zhao<sup>1,3</sup>, Yuanyuan Wang<sup>1,3\*</sup>

<sup>1</sup> *Key Laboratory of Materials Modification by Laser, Ion and Electron Beams (Ministry of Education), Dalian University of Technology, Dalian, Liaoning, China*

<sup>2</sup> *Science and Technology on Reactor System Design Technology Laboratory, Nuclear Power Institute of China, Chengdu, Sichuan, China*

<sup>3</sup> *State Key Laboratory of Structural Analysis, Optimization and CAE Software for Industrial Equipment, Dalian University of Technology, Dalian 116024, China*

**Table S1** Effect of supercell size on the formation energies of  $V_U$  in both UO<sub>2</sub> and UN as well as  $V_{U-2}$  in U<sub>3</sub>Si<sub>2</sub>. The cutoff energy of 500 eV with the  $k$ -point grid spacing of 0.04 Å<sup>-1</sup>, 0.02 Å<sup>-1</sup> and 0.03 Å<sup>-1</sup> is used for UO<sub>2</sub>, UN and U<sub>3</sub>Si<sub>2</sub>, respectively. The supercell sizes highlighted in bold are employed in current work.

| UO <sub>2</sub>  |              | UN               |             | U <sub>3</sub> Si <sub>2</sub> |             |
|------------------|--------------|------------------|-------------|--------------------------------|-------------|
| Supercell size   | $E_f$ (eV)   | Supercell size   | $E_f$ (eV)  | Supercell size                 | $E_f$ (eV)  |
| 1 × 2 × 2        | 12.75        | 1 × 2 × 2        | 6.05        | 2 × 2 × 2                      | 1.65        |
| <b>2 × 2 × 2</b> | <b>11.60</b> | <b>2 × 2 × 2</b> | <b>5.35</b> | 2 × 2 × 3                      | 1.49        |
| 2 × 2 × 3        | 11.28        | 2 × 2 × 3        | 5.72        | <b>2 × 2 × 4</b>               | <b>1.51</b> |
|                  |              |                  |             | 2 × 2 × 5                      | 1.76        |

\* Corresponding author's e-mail: [yuanyuanwang@dlut.edu.cn](mailto:yuanyuanwang@dlut.edu.cn) (Y.Y. Wang)

**Table S2** Predicted formation energies ( $E_f$ ) of different types of mono-atomic vacancies and mono-atomic interstitials in  $\text{UO}_2$ , UN and  $\text{U}_3\text{Si}_2$  by comparing with the existing data.

|                         |                  | Standard reference                                                                | U-rich state       | X-rich (X = O, N, Si) state |
|-------------------------|------------------|-----------------------------------------------------------------------------------|--------------------|-----------------------------|
| $\text{UO}_2$           | $V_{\text{U}}$   | 10.51                                                                             | 10.51              | 2.84                        |
|                         | Ref.             | 6.0 <sup>1</sup>                                                                  | 4.48 <sup>2</sup>  | -6.50 <sup>2</sup>          |
|                         | $V_{\text{O}}$   | 4.71                                                                              | -0.91              | 2.93                        |
|                         | Ref.             | 5.6 <sup>1</sup>                                                                  | -0.43 <sup>2</sup> | 5.06 <sup>2</sup>           |
|                         | $U_i$            | 2.59                                                                              | 2.59               | 10.26                       |
|                         | Ref.             | 8.2 <sup>1</sup>                                                                  | 2.50 <sup>2</sup>  | 13.48 <sup>2</sup>          |
|                         | $O_i$            | -0.34                                                                             | 5.28               | 1.44                        |
|                         | Ref.             | -1.6 <sup>1</sup>                                                                 | 3.05 <sup>2</sup>  | -2.44 <sup>2</sup>          |
| UN                      | $V_{\text{U}}$   | 5.35                                                                              | 5.35               | 3.88                        |
|                         | Ref.             | 3.74 <sup>3</sup> ; 6.90 <sup>4</sup>                                             | 3.66 <sup>5</sup>  | 2.09 <sup>5</sup>           |
|                         | $V_{\text{N}}$   | 3.33                                                                              | 0.35               | 1.82                        |
|                         | Ref.             | 4.24 <sup>3</sup> ; 7.91 <sup>4</sup>                                             | 0.62 <sup>5</sup>  | 1.42 <sup>5</sup>           |
|                         | $U_i$            | 4.28                                                                              | 4.28               | 5.75                        |
|                         | Ref.             | 12.62 <sup>4</sup>                                                                | 6.20 <sup>5</sup>  | 7.77 <sup>5</sup>           |
|                         | $N_i$            | 0.39                                                                              | 3.37               | 1.90                        |
|                         | Ref.             | 4.54 <sup>4</sup>                                                                 | 3.82 <sup>5</sup>  | 3.01 <sup>5</sup>           |
| $\text{U}_3\text{Si}_2$ | $V_{\text{U-1}}$ | 2.68                                                                              | 2.55               | 3.50                        |
|                         | Ref.             | 2.65 <sup>6</sup> ; 3.00 <sup>7</sup>                                             | 3.00 <sup>7</sup>  | 2.96 <sup>7</sup>           |
|                         | $V_{\text{U-2}}$ | 1.51                                                                              | 1.38               | 1.36                        |
|                         | Ref.             | 1.64 <sup>6</sup> ; 1.69 <sup>7</sup>                                             | 1.69 <sup>7</sup>  | 1.65 <sup>7</sup>           |
|                         | $V_{\text{Si}}$  | 1.56                                                                              | 0.89               | 0.92                        |
|                         | Ref.             | 2.48 <sup>6</sup> ; 1.79 <sup>7</sup>                                             | 1.77 <sup>7</sup>  | 1.84 <sup>7</sup>           |
|                         | $U_i$            | 2.30                                                                              | 2.43               | 2.45                        |
|                         | Ref.             | 1.66 <sup>6</sup> ; 0.65 <sup>6</sup> ,<br>1.17 <sup>6</sup> ; 0.87 <sup>7</sup>  | 0.86 <sup>7</sup>  | 0.91 <sup>7</sup>           |
|                         | $Si_i$           | 0.14                                                                              | 0.80               | 0.77                        |
|                         | Ref.             | 0.10 <sup>6</sup> ; 0.85 <sup>6</sup> ,<br>-0.20 <sup>6</sup> ; 0.55 <sup>7</sup> | 0.57 <sup>7</sup>  | 0.50 <sup>7</sup>           |

**Table S3** Incorporation energies ( $E_i$ ) between Xe atom and the typical trap sites in  $\text{UO}_2$ , UN and  $\text{U}_3\text{Si}_2$  by comparing with other DFT-calculated results.

|                         |                                    | Our work                                                | Ref.                                                                                                      |
|-------------------------|------------------------------------|---------------------------------------------------------|-----------------------------------------------------------------------------------------------------------|
| $\text{UO}_2$           | IS                                 | 9.45                                                    | 11.11 <sup>8</sup> ; 9.48 <sup>9</sup>                                                                    |
|                         | $V_{\text{U}}$                     | 2.85                                                    | 2.5 <sup>8</sup> ; 3.84 <sup>9</sup> ; 5.18 <sup>2</sup>                                                  |
|                         | $V_{\text{O}}$                     | 8.80                                                    | 9.5 <sup>8</sup> ; 6.89 <sup>9</sup> ; 9.01 <sup>2</sup>                                                  |
|                         | $\{V_{\text{U}} : V_{\text{O}}\}$  | 1.89                                                    | 2.45 <sup>8</sup>                                                                                         |
|                         | $\{V_{\text{U}} : 2V_{\text{O}}\}$ | 1.09                                                    | 1.38 <sup>8</sup> ; 1.18 <sup>9</sup> ; 2.90 <sup>2</sup>                                                 |
| UN                      | IS                                 | 14.64                                                   | 14.62 <sup>10</sup> ; 14.64 <sup>11</sup>                                                                 |
|                         | $V_{\text{U}}$                     | 4.03                                                    | 3.59 <sup>10</sup> ; 4.50 <sup>12</sup> ; 3.74 <sup>11</sup>                                              |
|                         | $V_{\text{N}}$                     | 8.87                                                    | 8.6 <sup>10</sup> ; 8.28 <sup>12</sup> ; 8.45 <sup>11</sup>                                               |
|                         | $\{V_{\text{U}} : V_{\text{N}}\}$  | 2.72 (in [100] direction),<br>4.08 (in [111] direction) | 2.79 <sup>11</sup> ; 3.37 (in [100] direction) <sup>12</sup> ;<br>4.90 (in [111] direction) <sup>12</sup> |
| $\text{U}_3\text{Si}_2$ | IS                                 | 3.86                                                    | 6.07 <sup>6</sup> ; 5.36 <sup>7</sup>                                                                     |
|                         | $V_{\text{U-1}}$                   | 0.17                                                    | 3.39 <sup>6</sup> ; 3.14 <sup>7</sup>                                                                     |
|                         | $V_{\text{U-2}}$                   | 0.01                                                    | 3.15 <sup>6</sup> ; 3.24 <sup>7</sup>                                                                     |
|                         | $V_{\text{Si}}$                    | 0.27                                                    | 3.39 <sup>6</sup> ; 3.26 <sup>7</sup>                                                                     |

### Supplementary Note 1: Chemical potential range

With the experimental formation enthalpy of  $\text{UO}_2$  ( $-11.25$  eV<sup>13, 14</sup>), the chemical potential variation of U and O is restricted in a range of  $-11.25$  eV  $< \Delta\mu_{\text{U}}^{\text{UO}_2} < 0$  eV and  $-5.63$  eV  $< \Delta\mu_{\text{O}}^{\text{UO}_2} < 0$  eV, respectively. Further, more experimental formation enthalpies of binary U-O phase<sup>14</sup>, including  $\text{UO}_2$ ,  $\text{U}_4\text{O}_9$ ,  $\text{U}_3\text{O}_8$  and  $\text{UO}_3$ , are involved to assess the variation range of  $\Delta\mu_{\text{U}}^{\text{UO}_2}$  and  $\Delta\mu_{\text{O}}^{\text{UO}_2}$ , which can be expressed as

$$-7.67 \text{ eV} < \Delta\mu_{\text{U}}^{\text{UO}_2} < 0 \quad (\text{s1})$$

$$-5.62 \text{ eV} < \Delta\mu_{\text{O}}^{\text{UO}_2} < -1.78 \text{ eV} \quad (\text{s2})$$

It should be pointed out that the chemical potential values of  $-1.78$  eV and  $-7.67$  eV are related to the critical points of intersection between  $\text{UO}_2$  and  $\text{U}_4\text{O}_9$  (i.e.,  $\text{UO}_{2.25}$ ) lines as shown in the  $\Delta\mu_{\text{U}}^{\text{UO}_2} - \Delta\mu_{\text{O}}^{\text{UO}_2}$  diagram (see Fig. S1(a)).

However, there is no available experimental data for the formation enthalpies of hyper-stoichiometric phases in binary U-O, U-N and U-Si phase diagram. The DFT-calculated total energies of uranium compounds are subsequently considered to obtain the U-rich boundary of chemical potentials<sup>15</sup>. All the used U-O and U-N phases in the first-principles calculations are performed using the same value of  $U_{\text{eff}}$  for the stoichiometric  $\text{UO}_2$  and UN. The DFT-calculated  $\mu_{\text{O}}$  as a function of  $\mu_{\text{U}}$  in the U-O system are displayed in Fig. S1(b). It is found that the phase transition from  $\text{UO}_3$  to  $\text{U}_2\text{O}_5$ ,  $\text{UO}_2$  and  $\text{UO}$  can occur by adding more U atoms. The DFT-calculated chemical potentials are shown as follows:

$$-9.77 \text{ eV} < \Delta\mu_{\text{U}}^{\text{UO}_2} < -1.19 \text{ eV} \quad (\text{s3})$$

$$-5.54 \text{ eV} < \Delta\mu_{\text{O}}^{\text{UO}_2} < -1.25 \text{ eV} \quad (\text{s4})$$

which can be fitted as  $\Delta H_{\text{UO}_k}^{\text{GGA}+\text{U}} - \Delta H_{\text{UO}_k}^{\text{Exp.}} = -0.002k - 0.024$  according to the dispersed points in Fig. S2(a). The corrected range of chemical potential of  $\text{UO}_2$  is limited by the critical points of intersection among the chemical potential lines of  $\text{UO}_2$ ,  $\text{U}_2\text{O}_5$  and  $\text{UO}$  in Fig. S1(c), which can be expressed as

$$-11.07 \text{ eV} < \Delta\mu_{\text{U}}^{\text{UO}_2} < -0.90 \text{ eV} \quad (\text{s5})$$

$$-5.80 \text{ eV} < \Delta\mu_{\text{O}}^{\text{UO}_2} < -0.71 \text{ eV} \quad (\text{s6})$$

From a comparison of chemical potential ranges, the difference assessed by experimental  $\mu_{\text{U}}$  and  $\mu_{\text{O}}$  values in Fig. S1(a) is smaller than that by the corrected

ones in Fig. S1(c). Additionally, a large deviation between the dispersed points and the fitting line is presented in Fig. S2(a). As a result, the experimental formation energy derived chemical potential is used as a consequence for  $\text{UO}_2$ , and the variation ranges of  $\mu_{\text{U}}^{\text{UO}_2}$  and  $\mu_{\text{O}}^{\text{UO}_2}$  are separately determined as follows:

$$-14.54 \text{ eV} < \mu_{\text{U}}^{\text{UO}_2} < -6.87 \text{ eV} \quad (\text{s7})$$

$$-10.55 \text{ eV} < \mu_{\text{O}}^{\text{UO}_2} < -6.71 \text{ eV} \quad (\text{s8})$$

Here, the values of  $\mu_{\text{U}}^{\text{UO}_2}$  and  $\mu_{\text{O}}^{\text{UO}_2}$  in U-rich  $\text{UO}_2$  are equal to  $-6.87 \text{ eV}$  and  $-10.55 \text{ eV}$ , respectively. While for the O-rich condition, the values of  $\mu_{\text{U}}^{\text{UO}_2}$  and  $\mu_{\text{O}}^{\text{UO}_2}$  are calculated as  $-14.54 \text{ eV}$  and  $-6.71 \text{ eV}$ , respectively. The same approach in estimating chemical potential using experimental formation enthalpies<sup>16-18</sup> is applied for UN to assess the variation range of  $\mu_{\text{U}}^{\text{UN}}$  and  $\mu_{\text{N}}^{\text{UN}}$  as follows:

$$-8.34 \text{ eV} < \mu_{\text{U}}^{\text{UN}} < -6.87 \text{ eV} \quad (\text{s9})$$

$$-11.28 \text{ eV} < \mu_{\text{N}}^{\text{UN}} < -9.81 \text{ eV} \quad (\text{s10})$$

It is worthy to note that the values of  $\mu_{\text{U}}^{\text{UN}}$  and  $\mu_{\text{N}}^{\text{UN}}$  for U-rich UN are  $-6.87 \text{ eV}$  and  $-11.28 \text{ eV}$ , respectively, and in the case of N-rich UN, the values of  $\mu_{\text{U}}^{\text{UN}}$  and  $\mu_{\text{N}}^{\text{UN}}$  equal to be  $-8.34 \text{ eV}$  and  $-9.81 \text{ eV}$ , respectively. A comparison of experimentally measured, DFT-calculated and corrected chemical potentials of UN shown in Figs. S2(d)-(f) indicates that the ranges of corrected  $\mu_{\text{U}}^{\text{UN}}$  and  $\mu_{\text{N}}^{\text{UN}}$  are much close to those of the experimentally measured ones. Therefore, the experimentally measured chemical potentials of U and N are employed in current work.

As for the chemical potential of hyper-stoichiometric  $\text{U}_3\text{Si}_2$ , the U-rich  $\text{U}_3\text{Si}_2$  in equilibrium with  $\gamma\text{-U}_3\text{Si}$  and the Si-rich  $\text{U}_3\text{Si}_2$  in equilibrium with  $\text{U}_3\text{Si}_5$  are taken into account. By referring to the experimental formation enthalpies of  $\text{U}_x\text{Si}_y$ <sup>15</sup>, the ferromagnetism property and  $U_{\text{eff}} = 1.0 \text{ eV}$  are used in the formation enthalpy calculation of  $\text{U}_x\text{Si}_y$ . The variation ranges of corrected chemical potentials  $\mu_{\text{U}}^{\text{U}_3\text{Si}_2}$  and  $\mu_{\text{Si}}^{\text{U}_3\text{Si}_2}$  are predicted as follows:

$$-7.02 \text{ eV} < \mu_{\text{U}}^{\text{U}_3\text{Si}_2} < -7.00 \text{ eV} \quad (\text{s11})$$

$$-6.08 \text{ eV} < \mu_{\text{Si}}^{\text{U}_3\text{Si}_2} < -6.05 \text{ eV} \quad (\text{s12})$$

In the case of U-rich  $\text{U}_3\text{Si}_2$ ,  $\mu_{\text{U}}^{\text{U}_3\text{Si}_2} = -7.00$  eV and  $\mu_{\text{Si}}^{\text{U}_3\text{Si}_2} = -6.08$  eV are separately obtained, and for Si-rich  $\text{U}_3\text{Si}_2$ ,  $\mu_{\text{U}}^{\text{U}_3\text{Si}_2} = -7.02$  eV and  $\mu_{\text{Si}}^{\text{U}_3\text{Si}_2} = -6.05$  eV are identified, respectively. In Figs. 2(g)-(i), it is obviously found that the variation in  $\mu_{\text{U}}^{\text{U}_3\text{Si}_2}$  and  $\mu_{\text{Si}}^{\text{U}_3\text{Si}_2}$  are nearly the same as those of the DFT-calculated ones. The corrected GGA+ $U$  approximation could evidently reduce the range of chemical potential in  $\text{U}_3\text{Si}_2$ . Hence the corrected chemical potentials of U and Si are applied. As is known, the phases in binary U-Si phase diagram are really complex for DFT calculations, and more formation enthalpies of  $\text{U}_x\text{Si}_y$  species should be experimentally measured in the future.

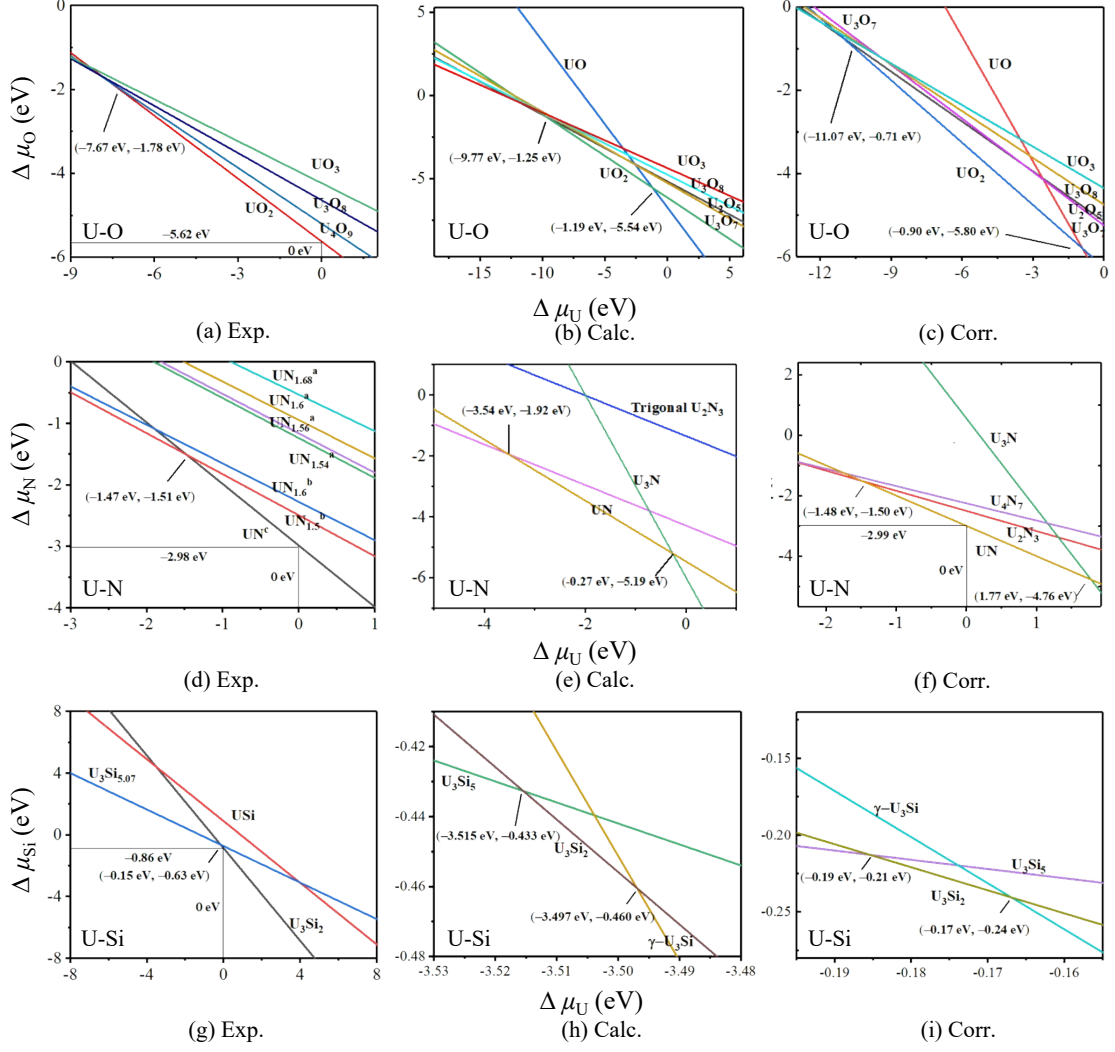

**Fig. S1** (a)-(c)  $\Delta\mu_O$  of the U-O phases, (d)-(f)  $\Delta\mu_N$  of the U-N phases and (g)-(i)  $\Delta\mu_{Si}$  of the U-Si phases as a function of  $\Delta\mu_U$ . The formation enthalpies are evaluated using (a)(d)(g) the experimental data, (b)(e)(h) the DFT-calculated data and (c)(f)(i) the data corrected from the Jain's approach. The superscript <sup>a, b, c</sup> respectively indicate the results from the work of Katsura and Serizawa <sup>16</sup>, Katsura and Sano <sup>17</sup>, and Hiroaki <sup>18</sup>.

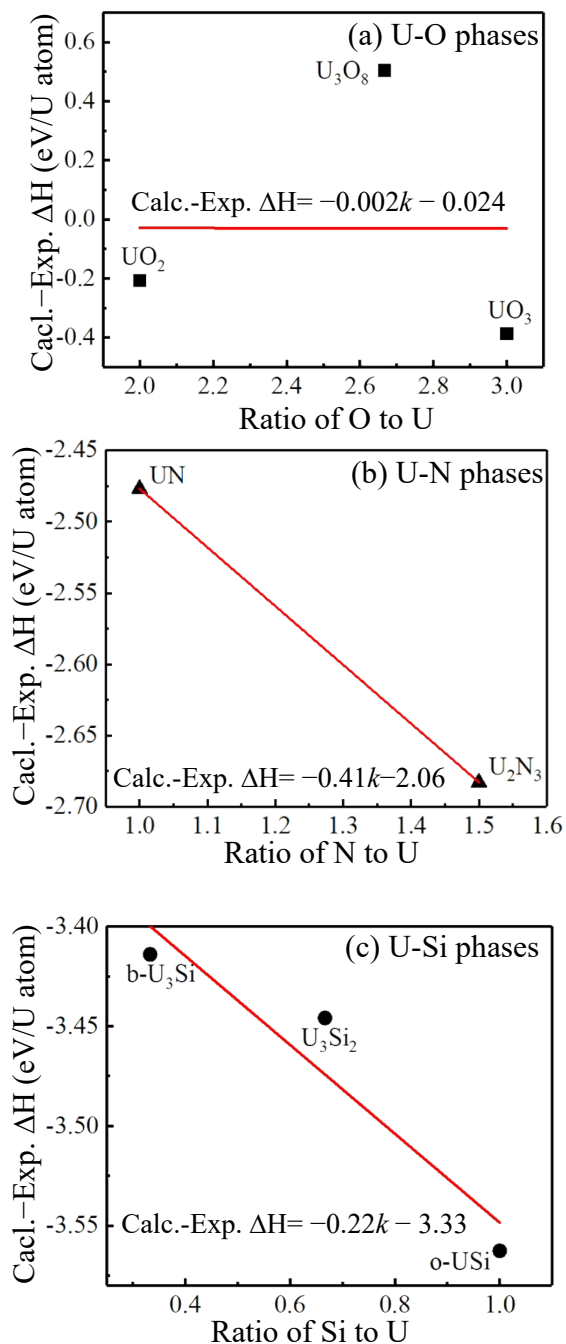

**Fig. S2** Difference between the calculated and experimental formation enthalpies as a function of the ratio of X (X = O, N, Si) to U in (a)  $\text{UO}_2$ , (b) UN and (c)  $\text{U}_3\text{Si}_2$ . The red lines are fitted via least-squares to the binary U-O, U-N and U-Si systems, respectively.  $k$  represents the ratio of X atom number to U atom number.



## Supplementary Note 2: Verification of formation energies

Most of the formation energy values of point defects in  $\text{UO}_2$ , UN and  $\text{U}_3\text{Si}_2$  agree well with the reference ones. In the standard reference, the formation energy values of defects in  $\text{UO}_2$  are ordered as:  $V_{\text{U}} > V_{\text{O}} > U_i > O_i$ , while Gupta et al. <sup>1</sup> found that the formation energy of mono-interstitial U is the highest one among the investigated point defects (i.e.,  $U_i > V_{\text{U}} > V_{\text{O}} > O_i$ ). In the U-rich environment of  $\text{UO}_2$ , the predicted and other DFT-calculated values of formation energy decrease in the order of  $V_{\text{U}} > O_i > U_i > V_{\text{O}}$  <sup>2</sup>, and our energetic trend of  $U_i > V_{\text{U}} > O_i > V_{\text{O}}$  in O-rich  $\text{UO}_2$  confirms well with that in Ref. <sup>2</sup>.

As for UN in the standard reference, the order of current formation energies of  $V_{\text{U}}$ ,  $V_{\text{N}}$ ,  $U_i$  and  $N_i$  change to  $V_{\text{U}} > U_i > V_{\text{N}} > N_i$ , which substantially differs from those of  $U_i > V_{\text{N}} > V_{\text{U}} > N_i$  <sup>4</sup>. Such different orders of  $V_{\text{U}}$  and  $U_i$  in not only  $\text{UO}_2$  but also UN come from different choice of  $U_{\text{eff}}$  for  $\alpha$ -U. A slight difference in the  $E_f$  order of U-rich UN between our result (i.e.,  $V_{\text{U}} > U_i > N_i > V_{\text{N}}$ ) and other DFT-calculated data (i.e.,  $U_i > V_{\text{U}} > N_i > V_{\text{N}}$  <sup>5</sup>) originates from the fact that our experimental data corrected chemical potentials shown in Fig. S1(i) are lower than the DFT derived ones used in Ref. <sup>5</sup>. Meanwhile, the values of  $E_f$  in the N-rich case are in the order of  $U_i > V_{\text{U}} > N_i > V_{\text{N}}$ , in accordance with the overall trend predicted by Kocevski et al. <sup>5</sup>.

Comparing the results of  $\text{U}_3\text{Si}_2$  under the standard reference with those in Refs. <sup>6</sup> and <sup>7</sup>, the evolution trend matches well with each other in the  $E_f^V$  order of  $V_{\text{U-1}} > V_{\text{Si}} > V_{\text{U-2}}$  and the  $E_f^i$  order of  $U_i > \text{Si}_i$ . It should note that our interstitial U ( $U_i$ ) inserted at the U octahedron site (i.e., 2b site <sup>19,20</sup>) remains in the octahedral site after relaxation. The formation energies of mono-vacancy and mono-interstitial U and Si are ordered as  $V_{\text{U-1}} > V_{\text{U-2}} > V_{\text{Si}}$  and  $U_i > \text{Si}_i$ , respectively, in not only U-rich but also Si-rich  $\text{U}_3\text{Si}_2$  samples, which slightly deviate from the prediction <sup>7</sup>. It can be explained by different magnetic considerations in these work.

## Reference

1. F. Gupta, G. Brillant and A. Pasturel, *Philos. Mag.*, 2007, **87**, 2561-2569.
2. J. Yu, R. Devanathan and W. J. Weber, *J. Phys-Condens. Mat.*, 2009, **21**, 435401.
3. M. Klipfel and P. Van Uffelen, *J. Nucl. Mater.*, 2012, **422**, 137-142.
4. J. H. Lan, Z. C. Zhao, Q. Wu and Y. L. Zhao, *J. Appl. Phys.*, 2013, **114**, 202.
5. V. Kocevski, D. A. Rehn, M. W. D. Cooper and D. A. Andersson, *J. Nucl. Mater.*, 2021, **22**, 153401.

6. A. D. Andersson, *Density functional theory calculations of defect and fission gas properties in U-Si fuels*, United States, 2016.
7. D. A. Andersson, X. Y. Liu, B. Beeler, S. C. Middleburgh, A. Claisse and C. R. Stanek, *J. Nucl. Mater.*, 2019, **515**, 312-325.
8. P. V. Nerikar, X. Y. Liu, B. P. Uberuaga, C. R. Stanek and S. B. Sinnott, *J. Phys-Condens. Mat.*, 2009, **21**, 435602.
9. P. Garcia, G. Martin, C. Sabathier, G. Carlot, A. Michel, P. Martin, B. Dorado, M. Freyss, M. Bertolus and R. Skorek, *Nucl. Instrum. Meth.*, 2012, **277**, 98-108.
10. A. Claisse, T. Schuler, D. A. Lopes and P. Olsson, *Phys. Rev. B*, 2016, **94**, 174302.
11. A. Claisse, M. Klipfel, N. Lindbom, M. Freyss and P. Olsson, *J. Nucl. Mater.*, 2016, **478**, 119-124.
12. M. Klipfel, V. Di Marcello, A. Schubert, J. van de Laar and P. Van Uffelen, *J. Nucl. Mater.*, 2013, **442**, 253-261.
13. C. Guéneau, M. Baichi, D. Labroche, C. Chatillon and B. Sundman, *J. Nucl. Mater.*, 2002, **304**, 161-175.
14. Emerson, Vathonne, Julia, Wiktor, Michel, Freyss, Gérald, Jomard, Marjorie and Bertolus, *J. Phys-Condens. Mat.*, 2014, **26**, 325501.
15. C.-K. Chung, X. Guo, G. Wang, T. L. Wilson, J. T. White, A. T. Nelson, A. Shelyug, H. Boukhalfa, P. Yang, E. R. Batista, A. A. Migdisov, R. C. Roback, A. Navrotsky and H. Xu, *J. Nucl. Mater.*, 2019, **523**, 101-110.
16. M. Katsura and H. Serizawa, *J. Alloy. Compd.*, 1992, **187**, 389-399.
17. Masahiro KATSURA and T. SANO, *J. Nucl. Sci. Technol.*, 1967, **4**, 283-288.
18. T. Hiroaki, *J. Nucl. Mater.*, 1974, **51**, 78-89.
19. V. Kocevski, D. A. Lopes, A. J. Claisse and T. M. Besmann, *Nat. Commun.*, 2020, **11**, 2621.
20. S. C. Middleburgh, A. Claisse, D. A. Andersson, R. W. Grimes, P. Olsson and S. Mašková, *J. Nucl. Mater.*, 2018, **501**, 234-237.
